# Supplementary material for: Drought response transcriptomes are altered in poplar with reduced tonoplast sucrose transporter expression
Source: PubMed Central journal article supplement (PMC5027551; doi:10.1038/srep33655), 2016-09-19
Supplement: srep33655-s1.pdf [file srep33655-s1.pdf]

## Supplementary Information

### Drought response transcriptomics are altered in poplar with reduced tonoplast sucrose transporter expression

Liang-Jiao Xue, Christopher J. Frost, Chung-Jui Tsai, Scott A. Harding

**Table S1.** T-DNA insertion site analysis.

**Figure S1.** Plant-wide transcript abundance of *SUT* genes in leaf, xylem, bark and roots of wild type and *SUT4*-RNAi transgenic plants.

**Figure S2.** Transcript abundance of sucrose cleaving enzymes in different organs of WT and *SUT4*-RNAi plants under WW conditions.

**Figure S3.** Inter-organ correlations of *AQP* transcript abundance.

**Figure S4.** Heatmap illustration of *SUT4*-RNAi and DR effects on *LEA*, *HSP20*, *BSP/VSP* transcript abundance in roots.

**Figure S5.** Heatmap illustration of *SUT4*-RNAi and DR effects on transcript abundance of genes associated with abscisic acid, jasmonic acid and ethylene signaling in roots.

**Dataset S1.** Gene expression analysis by RNA-Seq.

**Dataset S2.** Root co-expression gene network analysis.

**Table S1. T-DNA insertion site analysis**

| Line | Total read pairs (M) | Hybrid read pairs <sup>1</sup> | Insertion site                      | Nearest genome coordinate<br>( <i>P. trichocarpa</i> v3.0) |
|------|----------------------|--------------------------------|-------------------------------------|------------------------------------------------------------|
| F    | 32,756,771           | 4                              | Potri.009G049200                    | Chr09:5430076                                              |
| G    | 29,853,306           | 5                              | intergenic (3' to Potri.004G190400) | Chr04:20513764                                             |
| H    | 12,791,788           | 0                              | -                                   | -                                                          |

<sup>1</sup> Junction-flanking read pairs, with one read of the pair mapping to the T-DNA and the other to the genome.

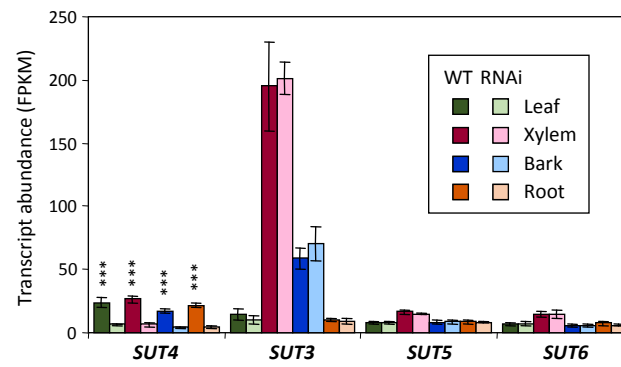

**Fig. S1.** Plant-wide transcript abundance of *SUT* genes in leaf, xylem, bark and roots of wild type and *SUT4*-RNAi transgenic plants. Values represent FPKM means  $\pm$  SD for n=3 biological replicates. Statistical significance of transgenic effect was determined using two-sample student's *t*-test (\*\*\*,  $P \leq 0.005$ ).

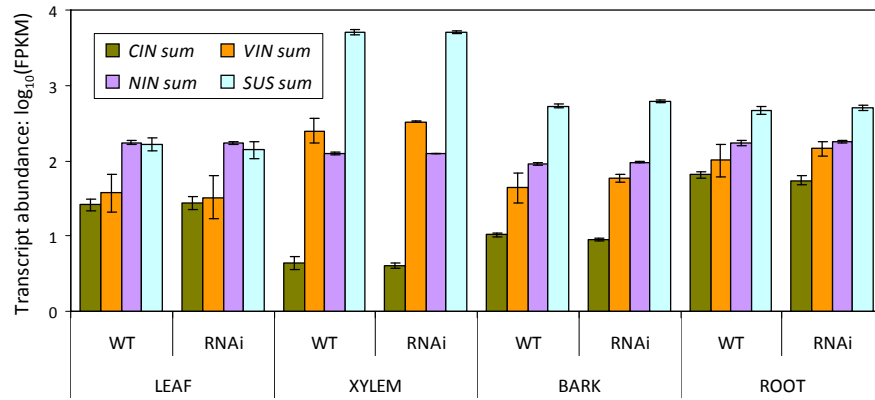

**Fig. S2.** Transcript abundance of sucrose cleaving enzymes in different organs of WT and *SUT4*-RNAi plants under WW conditions. FPKM values were summed from multiple gene models of each gene family for each biological replicate and log<sub>10</sub>-transformed. Data are means ± SD of n=3 biological replicates. *CIN*, cell-wall invertase; *VIN*, vacuolar invertase; *NIN*, neutral invertase; *SUS*, sucrose synthase.

|      |         | Potri.016G089500 | Potri.016G113300 | Potri.008G065600 | Potri.006G128200 | Potri.006G128000 | Potri.004G176300 | Potri.010G222700 | Potri.010G191900 | Potri.008G039600 | Potri.009G136600 |
|------|---------|------------------|------------------|------------------|------------------|------------------|------------------|------------------|------------------|------------------|------------------|
|      |         | PIP2.7           | PIP1.5           | PIP1.2           | PIP2.6           | PIP2.5           | PIP2.2           | PIP2.3           | PIP1.1           | PIP2.4           | PIP2.1           |
| WT   | L vs. B | 0.84             | 0.41             | 0.80             | 0.58             | 0.75             | 0.00             | 0.00             | 0.06             | 0.00             | 0.53             |
|      | L vs. X | 0.75             | 0.60             | 0.79             | 0.74             | 0.81             | 0.00             | 0.35             | 0.06             | 0.40             | 0.28             |
|      | L vs. R | 0.77             | 0.82             | 0.49             | 0.00             | 0.00             | 0.65             | 0.02             | 0.49             | 0.42             | 0.36             |
|      | R vs. B | 0.59             | 0.52             | 0.62             | 0.10             | 0.08             | 0.08             | 0.04             | 0.10             | 0.42             | 0.22             |
|      | R vs. X | 0.60             | 0.78             | 0.28             | 0.07             | 0.01             | 0.00             | 0.07             | 0.10             | 0.30             | 0.00             |
|      | B vs. X | 0.95             | 0.47             | 0.78             | 0.82             | 0.80             | 0.75             | 0.55             | 0.45             | 0.12             | 0.01             |
| RNAi | L vs. B | 0.84             | 0.54             | 0.91             | 0.02             | 0.02             | 0.02             | 0.12             | 0.18             | 0.56             | 0.24             |
|      | L vs. X | 0.86             | 0.41             | 0.77             | 0.00             | 0.07             | 0.00             | 0.01             | 0.02             | 0.44             | 0.02             |
|      | L vs. R | 0.16             | 0.12             | 0.00             | 0.04             | 0.00             | 0.00             | 0.02             | 0.33             | 0.04             | 0.14             |
|      | R vs. B | 0.34             | 0.32             | 0.11             | 0.04             | 0.00             | 0.00             | 0.03             | 0.23             | 0.02             | 0.04             |
|      | R vs. X | 0.22             | 0.61             | 0.00             | 0.14             | 0.03             | 0.00             | 0.18             | 0.02             | 0.24             | 0.24             |
|      | B vs. X | 0.96             | 0.69             | 0.89             | 0.53             | 0.55             | 0.54             | 0.77             | 0.34             | 0.29             | 0.04             |
| FPKM | 81      | 112              | 407              | 143              | 280              | 179              | 426              | 408              | 290              | 552              |                  |

|      |         | Potri.006G239700 | Potri.001G235300 | Potri.003G050900 | Potri.009G027200 | Potri.001G186700 | Potri.008G050700 | Potri.004G216500 | Potri.006G121700 | Potri.016G098200 | Potri.001G157000 |
|------|---------|------------------|------------------|------------------|------------------|------------------|------------------|------------------|------------------|------------------|------------------|
|      |         | TIP4.1           | TIP1.1           | TIP2.2           | TIP1.2           | TIP2.1           | TIP1.4           | TIP1.8           | TIP1.6           | TIP1.5           | TIP2.4           |
| WT   | L vs. B | 0.58             | 0.81             | 0.85             | 0.54             | 0.07             | 0.48             | 0.14             | 0.42             | 0.83             | 0.33             |
|      | L vs. X | 0.39             | 0.67             | 0.56             | 0.25             | 0.72             | 0.75             | 0.14             | 0.04             | 0.00             | 0.06             |
|      | L vs. R | 0.57             | 0.22             | 0.18             | 0.22             | 0.33             | 0.19             | 0.02             | 0.01             | 0.24             | 0.02             |
|      | R vs. B | 0.76             | 0.19             | 0.19             | 0.17             | 0.49             | 0.01             | 0.27             | 0.12             | 0.33             | 0.00             |
|      | R vs. X | 0.68             | 0.13             | 0.68             | 0.06             | 0.31             | 0.08             | 0.05             | 0.61             | 0.00             | 0.12             |
|      | B vs. X | 0.88             | 0.92             | 0.69             | 0.83             | 0.00             | 0.64             | 0.00             | 0.33             | 0.00             | 0.09             |
| RNAi | L vs. B | 0.28             | 0.29             | 0.12             | 0.83             | 0.29             | 0.00             | 0.02             | 0.00             | 0.21             | 0.08             |
|      | L vs. X | 0.29             | 0.29             | 0.04             | 0.55             | 0.10             | 0.01             | 0.09             | 0.16             | 0.53             | 0.22             |
|      | L vs. R | 0.06             | 0.34             | 0.02             | 0.21             | 0.04             | 0.13             | 0.17             | 0.00             | 0.27             | 0.37             |
|      | R vs. B | 0.43             | 0.20             | 0.19             | 0.27             | 0.00             | 0.16             | 0.77             | 0.01             | 0.02             | 0.23             |
|      | R vs. X | 0.34             | 0.25             | 0.16             | 0.26             | 0.07             | 0.00             | 0.11             | 0.16             | 0.01             | 0.13             |
|      | B vs. X | 0.33             | 0.99             | 0.83             | 0.87             | 0.53             | 0.21             | 0.02             | 0.03             | 0.13             | 0.07             |
| FPKM | 65      | 114              | 25               | 116              | 431              | 394              | 23               | 405              | 128              | 186              |                  |

**Fig. S3.** Inter-organ correlations of *AQP* transcript abundance. A, *PIP* genes. B, *TIP* genes. The upper half of each panel presents correlations between WT organs, and the lower half, RNAi transgenic organs. Values are  $r^2$  from linear regressions with  $n=9$  independent comparisons for each gene and organ pair. The FPKM value for each gene is presented as average transcript abundance across all organs. L, leaf; B, bark; X, xylem and R, root.



| A (ABA)                  |         |             |             |             | C (ethylene) |                  |         |             |             |             |      |
|--------------------------|---------|-------------|-------------|-------------|--------------|------------------|---------|-------------|-------------|-------------|------|
|                          | RNAi/WT |             | DR/WW       |             | FPKM         |                  | RNAi/WT |             | DR/WW       |             | FPKM |
|                          | WW      | DR          | WT          | RNAi        |              |                  | WW      | DR          | WT          | RNAi        |      |
| <b>PYR/PYL/RCAR</b>      |         |             |             |             |              | <b>ERF</b>       |         |             |             |             |      |
| Potri.003G091700         | -0.3    | -0.4        | <b>-1.8</b> | <b>-1.9</b> | 80           | Potri.004G197400 | 0.2     | <b>1.1</b>  | -0.5        | 0.4         | 165  |
| Potri.001G092500         | 0.0     | -0.2        | -0.7        | <b>-0.9</b> | 62           | Potri.007G090600 | 0.4     | 0.2         | <b>-1.8</b> | <b>-2.0</b> | 164  |
| Potri.006G104100         | -0.4    | 0.3         | <b>-3.7</b> | <b>-3.0</b> | 58           | Potri.010G006800 | -0.1    | <b>-1.1</b> | <b>2.0</b>  | <b>1.0</b>  | 163  |
| Potri.016G125400         | -0.4    | 0.7         | <b>-3.4</b> | <b>-2.3</b> | 52           | Potri.005G168700 | 0.0     | <b>0.8</b>  | -0.3        | 0.5         | 150  |
| Potri.003G139200         | -0.1    | -0.3        | <b>-1.7</b> | <b>-1.8</b> | 50           | Potri.005G077300 | 0.2     | -0.1        | <b>-1.1</b> | <b>-1.3</b> | 107  |
| Potri.010G183900         | -0.7    | 1.0         | <b>-3.9</b> | <b>-2.2</b> | 16           | Potri.003G150800 | 0.3     | <b>1.5</b>  | 0.0         | <b>1.2</b>  | 97   |
| <b>PP2C</b>              |         |             |             |             |              | Potri.011G115600 | -0.1    | 0.4         | <b>0.9</b>  | <b>1.5</b>  | 89   |
| Potri.008G059200         | 0.2     | 0.1         | <b>2.2</b>  | <b>2.1</b>  | 72           | Potri.002G094200 | -0.1    | 0.3         | 0.5         | <b>0.9</b>  | 82   |
| Potri.010G199600         | -0.1    | 0.0         | <b>2.7</b>  | <b>2.8</b>  | 50           | Potri.005G195000 | -0.6    | <b>2.2</b>  | <b>2.7</b>  | <b>5.5</b>  | 77   |
| Potri.012G002700         | -0.6    | -0.6        | <b>3.8</b>  | <b>3.8</b>  | 44           | Potri.007G138100 | 0.3     | 0.4         | <b>1.0</b>  | <b>1.0</b>  | 68   |
| Potri.009G037300         | -0.6    | 0.0         | 4.1         | <b>4.7</b>  | 41           | Potri.002G065600 | 0.0     | <b>1.9</b>  | <b>3.0</b>  | <b>4.9</b>  | 58   |
| Potri.T137100            | -0.7    | <b>-1.1</b> | <b>3.6</b>  | <b>3.2</b>  | 25           | Potri.014G159000 | 0.2     | <b>1.9</b>  | 0.7         | <b>2.4</b>  | 56   |
| Potri.001G245200         | -0.1    | -0.5        | <b>4.0</b>  | <b>3.7</b>  | 19           | Potri.008G210900 | -0.6    | -0.2        | <b>-1.6</b> | <b>-1.2</b> | 44   |
| Potri.015G018800         | -0.8    | <b>-1.4</b> | <b>3.5</b>  | <b>2.9</b>  | 12           | Potri.001G356100 | 0.0     | <b>0.9</b>  | 0.3         | <b>1.3</b>  | 40   |
| <b>SnRK2</b>             |         |             |             |             |              | Potri.004G047600 | 0.3     | <b>1.2</b>  | 0.7         | <b>1.6</b>  | 39   |
| Potri.002G099700         | 0.2     | 0.4         | <b>2.0</b>  | <b>2.3</b>  | 10           | Potri.019G131300 | 0.4     | <b>1.9</b>  | -0.4        | <b>1.0</b>  | 37   |
| <b>SnRK3</b>             |         |             |             |             |              | Potri.011G057000 | 0.3     | <b>1.3</b>  | <b>1.3</b>  | <b>2.3</b>  | 32   |
| Potri.006G186200         | -0.5    | <b>-1.2</b> | 0.0         | -0.6        | 133          | Potri.008G120100 | 0.1     | <b>1.3</b>  | -0.3        | <b>0.9</b>  | 31   |
| Potri.016G133900         | -0.4    | <b>-0.9</b> | <b>1.7</b>  | <b>1.3</b>  | 69           | Potri.017G013700 | -0.1    | 0.3         | 0.5         | <b>0.9</b>  | 27   |
| Potri.010G079000         | 0.1     | <b>1.2</b>  | <b>-1.8</b> | <b>-0.7</b> | 60           | Potri.001G397200 | 0.5     | <b>1.0</b>  | 0.6         | <b>1.1</b>  | 27   |
| Potri.010G002500         | 0.0     | 0.5         | <b>1.8</b>  | <b>2.3</b>  | 58           | Potri.005G140900 | 0.3     | <b>1.0</b>  | -0.1        | 0.6         | 26   |
| Potri.018G108500         | -0.1    | -0.1        | <b>1.4</b>  | <b>1.4</b>  | 53           | Potri.014G025200 | -0.2    | 0.7         | 0.3         | <b>1.2</b>  | 22   |
| Potri.016G133500         | -0.1    | 0.6         | <b>1.3</b>  | <b>2.0</b>  | 47           | Potri.001G154100 | -0.1    | <b>3.3</b>  | -0.5        | <b>2.8</b>  | 22   |
| Potri.006G062800         | -0.5    | <b>-1.4</b> | <b>1.6</b>  | <b>0.7</b>  | 42           | Potri.003G081200 | 0.2     | <b>3.5</b>  | <b>-1.3</b> | <b>2.0</b>  | 21   |
| Potri.018G109100         | -0.1    | -0.1        | <b>1.3</b>  | <b>1.3</b>  | 39           | Potri.014G126100 | 0.2     | <b>1.4</b>  | -0.3        | <b>0.8</b>  | 20   |
| Potri.019G128100         | -0.1    | -0.2        | <b>1.6</b>  | <b>1.5</b>  | 36           | Potri.007G046500 | -0.1    | 0.4         | <b>-1.1</b> | -0.6        | 18   |
| Potri.014G104200         | 0.2     | 0.6         | <b>1.3</b>  | <b>1.7</b>  | 28           | Potri.012G134000 | 0.3     | <b>4.0</b>  | 1.1         | <b>4.8</b>  | 18   |
| Potri.018G019900         | -0.5    | <b>1.2</b>  | -0.5        | <b>1.2</b>  | 20           | Potri.013G135600 | 0.7     | <b>1.2</b>  | <b>-0.9</b> | -0.4        | 18   |
| Potri.011G067600         | -0.1    | 0.2         | 0.6         | <b>0.9</b>  | 17           | Potri.006G138900 | -0.8    | 0.6         | <b>4.0</b>  | <b>5.4</b>  | 17   |
| Potri.003G181900         | -0.2    | 0.4         | <b>2.1</b>  | <b>2.6</b>  | 13           | Potri.009G075300 | -0.1    | <b>-1.2</b> | 0.6         | -0.5        | 17   |
| Potri.013G156000         | 0.1     | 0.4         | <b>1.0</b>  | <b>1.4</b>  | 12           | Potri.009G101900 | -0.2    | <b>2.2</b>  | 1.3         | <b>3.8</b>  | 16   |
| Potri.008G160200         | -0.7    | <b>2.1</b>  | -0.9        | <b>1.8</b>  | 8            | Potri.008G073600 | 0.0     | 0.3         | 0.9         | <b>1.2</b>  | 15   |
| <b>ASR1</b>              |         |             |             |             |              | Potri.002G039100 | 0.2     | <b>1.6</b>  | <b>1.1</b>  | <b>2.5</b>  | 14   |
| Potri.005G193800         | -0.6    | <b>-1.8</b> | <b>2.9</b>  | <b>1.8</b>  | 15           | Potri.010G183700 | 0.1     | <b>1.5</b>  | 0.4         | <b>1.9</b>  | 13   |
| <b>ABF</b>               |         |             |             |             |              | Potri.013G158500 | -0.1    | <b>0.9</b>  | <b>-1.6</b> | -0.7        | 12   |
| Potri.014G028200         | -0.2    | 0.0         | <b>1.5</b>  | <b>1.6</b>  | 66           | Potri.011G162400 | -0.3    | -0.2        | <b>1.2</b>  | <b>1.3</b>  | 11   |
| Potri.004G140600         | 0.0     | -0.1        | <b>1.7</b>  | <b>1.7</b>  | 36           | Potri.003G150700 | 0.1     | <b>1.4</b>  | -0.2        | <b>1.1</b>  | 11   |
| Potri.009G101200         | 0.1     | -0.5        | <b>1.5</b>  | <b>0.8</b>  | 31           | Potri.007G076800 | -0.8    | <b>4.2</b>  | -0.1        | <b>4.8</b>  | 11   |
| Potri.002G067400         | -0.2    | <b>0.7</b>  | 0.2         | <b>1.1</b>  | 14           | Potri.001G280100 | -0.5    | <b>-1.7</b> | -0.3        | <b>-1.5</b> | 11   |
| Potri.002G124000         | -0.3    | <b>1.2</b>  | -0.5        | <b>1.0</b>  | 9            |                  |         |             |             |             |      |
| <b>B (jasmonic acid)</b> |         |             |             |             |              |                  |         |             |             |             |      |
| <b>JAZ</b>               |         |             |             |             |              |                  |         |             |             |             |      |
| Potri.006G139400         | 0.1     | <b>3.3</b>  | 0.3         | <b>3.5</b>  | 125          |                  |         |             |             |             |      |
| Potri.010G108200         | 0.2     | <b>1.5</b>  | 0.4         | <b>1.8</b>  | 96           |                  |         |             |             |             |      |
| Potri.006G217200         | 0.1     | <b>0.7</b>  | <b>1.0</b>  | <b>1.6</b>  | 84           |                  |         |             |             |             |      |
| Potri.003G068900         | 0.5     | <b>4.3</b>  | <b>1.7</b>  | <b>5.6</b>  | 69           |                  |         |             |             |             |      |
| Potri.008G133400         | 0.2     | <b>1.6</b>  | 0.8         | <b>2.1</b>  | 65           |                  |         |             |             |             |      |
| Potri.003G165000         | 0.0     | <b>2.9</b>  | <b>1.5</b>  | <b>4.4</b>  | 34           |                  |         |             |             |             |      |
| Potri.011G083900         | 0.6     | <b>6.3</b>  | 0.6         | <b>6.4</b>  | 27           |                  |         |             |             |             |      |
| Potri.001G062500         | -0.4    | <b>2.3</b>  | <b>1.7</b>  | <b>4.4</b>  | 26           |                  |         |             |             |             |      |
| Potri.001G166200         | 0.5     | <b>4.1</b>  | 0.9         | <b>4.6</b>  | 14           |                  |         |             |             |             |      |

**Fig. S5.** Heatmap illustration of *SUT4*-RNAi and DR effects on transcript abundance of genes associated with ABA (A), JA (B) and ethylene (C) signaling in roots. Values are log<sub>2</sub>-transformed fold-changes. Genes are sorted by their transcript abundance (FPKM average) in roots. Significant RNAi or DR effects are denoted by bold-underlines ( $Q \leq 0.05$ ) or bold-italics ( $P \leq 0.05$ ). *ASR*, ABA stress ripening; *ABF*, ABA-responsive element binding factor; *ERF*, ethylene response factor; *JAZ*, jasmonate ZIM-domain; *PP2C*, protein phosphatase 2C; *PYR/PYL/RCAR*, pyrabactin resistance/PYR-like/regulatory components of ABA receptor family; *SnRK*, sucrose non-fermenting-1 (SNF1)-related protein kinase.
